# Supplementary material for: Reporting Standards for a Bland–Altman Agreement Analysis: A Review of Methodological Reviews
Source: MDPI journal article supplement (doi:10.3390/diagnostics10050334), 2020-05-22
Supplement: s1 [file s1]

Supplemental Table 3: Reasons for exclusions

| Search item no. | Article                                                                                                                                                                                                                                                                                                                                                                                          | Reason for exclusion                                        |
|-----------------|--------------------------------------------------------------------------------------------------------------------------------------------------------------------------------------------------------------------------------------------------------------------------------------------------------------------------------------------------------------------------------------------------|-------------------------------------------------------------|
| 228             | Walter SR, Dunsmuir WTM, Westbrook JI. Inter-observer agreement and reliability assessment for observational studies of clinical work. <i>J Biomed Inform.</i> 2019 Dec;100:103317. doi: 10.1016/j.jbi.2019.103317.                                                                                                                                                                              | Reliability (iota score; kappa)                             |
| 764             | Gerke O, Möller S, Debrabant B, Halekoh U; Odense Agreement Working Group. Experience Applying the Guidelines for Reporting Reliability and Agreement Studies (GRRAS) Indicated Five Questions Should Be Addressed in the Planning Phase from a Statistical Point of View. <i>Diagnostics (Basel)</i> . 2018 Sep 24;8(4). pii: E69. doi: 10.3390/diagnostics8040069.                             | GRRAS (comment)                                             |
| 1170            | Dixon PM, Saint-Maurice PF, Kim Y, Hibbing P, Bai Y, Welk GJ. A Primer on the Use of Equivalence Testing for Evaluating Measurement Agreement. <i>Med Sci Sports Exerc.</i> 2018 Apr;50(4):837-845. doi: 10.1249/MSS.0000000000001481.                                                                                                                                                           | Methodology (alternative to BA LoA: bioequivalence testing) |
| 1546            | Barth J, de Boer WE, Busse JW, Hoving JL, Kedzia S, Couban R, Fischer K, von Allmen DY, Spanjer J, Kunz R. Inter-rater agreement in evaluation of disability: systematic review of reproducibility studies. <i>BMJ</i> . 2017 Jan 25;356:j14. doi: 10.1136/bmj.j14.                                                                                                                              | Reliability (intraclass correlation coefficient (ICC))      |
| 1768            | Farzin B, Gentric JC, Pham M, Tremblay-Paquet S, Brosseau L, Roy C, Jamali S, Chagnon M, Darsaut TE, Guilbert F, Naggara O, Raymond J. Agreement studies in radiology research. <i>Diagn Interv Imaging.</i> 2017 Mar;98(3):227-233. doi: 10.1016/j.diii.2016.05.014.                                                                                                                            | GRRAS (application; systematic review)                      |
| 2215            | Dhillon SS, Sima CA, Kirkham AR, Syed N, Camp PG. Physical Activity Measurement Accuracy in Individuals With Chronic Lung Disease: A Systematic Review With Meta-Analysis of Method Comparison Studies. <i>Arch Phys Med Rehabil.</i> 2015 Nov;96(11):2079-88.e10. doi: 10.1016/j.apmr.2015.05.015.                                                                                              | Meta-analysis on quantitative outcome measures              |
| 2331            | Carkeet A. Exact parametric confidence intervals for Bland-Altman limits of agreement. <i>Optom Vis Sci.</i> 2015 Mar;92(3):e71-80. doi: 10.1097/OPX.0000000000000513.                                                                                                                                                                                                                           | Methodology (confidence intervals for BA LoA)               |
| 2493            | Xu S, Lorber MF. Interrater agreement statistics with skewed data: evaluation of alternatives to Cohen's kappa. <i>J Consult Clin Psychol.</i> 2014 Dec;82(6):1219-27. doi: 10.1037/a0037489.                                                                                                                                                                                                    | Methodology (alternatives to kappa)                         |
| 2976            | Oster NV, Carney PA, Allison KH, Weaver DL, Reisch LM, Longton G, Onega T, Pepe M, Geller BM, Nelson HD, Ross TR, Tosteson AN, Elmore JG. Development of a diagnostic test set to assess agreement in breast pathology: practical application of the Guidelines for Reporting Reliability and Agreement Studies (GRRAS). <i>BMC Womens Health.</i> 2013 Feb 5;13:3. doi: 10.1186/1472-6874-13-3. | GRRAS (application)                                         |
| 3137            | Hoy D, Brooks P, Woolf A, Blyth F, March L, Bain C, Baker P, Smith E, Buchbinder R. Assessing risk of bias in prevalence studies: modification of an existing tool and evidence of interrater agreement. <i>J Clin Epidemiol.</i> 2012 Sep;65(9):934-9. doi: 10.1016/j.jclinepi.2011.11.014.                                                                                                     | Methodology (assessment of risk of study bias)              |
| 3391            | Jones M, Dobson A, O'Brian S. A graphical method for                                                                                                                                                                                                                                                                                                                                             | Methodology (graphical                                      |

|                         |                                                                                                                                                                                                                                                                                                                            |                                                                                                                                                          |
|-------------------------|----------------------------------------------------------------------------------------------------------------------------------------------------------------------------------------------------------------------------------------------------------------------------------------------------------------------------|----------------------------------------------------------------------------------------------------------------------------------------------------------|
|                         | assessing agreement with the mean between multiple observers using continuous measures. <i>Int J Epidemiol</i> . 2011 Oct;40(5):1308-13. doi: 10.1093/ije/dyr109.                                                                                                                                                          | assessment of agreement of more than two observers in quantitative outcomes)                                                                             |
| 3442<br>(3471,<br>3527) | Kottner J, Audige L, Brorson S, Donner A, Gajewski BJ, Hróbjartsson A, Roberts C, Shoukri M, Streiner DL. Guidelines for Reporting Reliability and Agreement Studies (GRRAS) were proposed. <i>Int J Nurs Stud</i> . 2011 Jun;48(6):661-71. doi: 10.1016/j.ijnurstu.2011.01.016.                                           | GRRAS (guideline proposal)                                                                                                                               |
| 3679                    | Jacobs PC, Prokop M, Oen AL, van der Graaf Y, Grobbee DE, Mali WP. Semiquantitative assessment of cardiovascular disease markers in multislice computed tomography of the chest: interobserver and intraobserver agreements. <i>J Comput Assist Tomogr</i> . 2010 Mar-Apr;34(2):279-84. doi: 10.1097/RCT.0b013e3181bbcff6. | Reliability (weighted kappa, ICC)                                                                                                                        |
| 3904                    | Cecconi M, Rhodes A, Poloniecki J, Della Rocca G, Grounds RM. Bench-to-bedside review: the importance of the precision of the reference technique in method comparison studies--with specific reference to the measurement of cardiac output. <i>Crit Care</i> . 2009;13(1):201. doi: 10.1186/cc7129.                      | Methodology (30% in the percentage error; worked example)                                                                                                |
| 4394                    | Ouwendijk R, Kock MC, Visser K, Pattynama PM, de Haan MW, Hunink MG. Interobserver agreement for the interpretation of contrast-enhanced 3D MR angiography and MDCT angiography in peripheral arterial disease. <i>AJR Am J Roentgenol</i> . 2005 Nov;185(5):1261-7.                                                       | Reliability (weighted kappa)                                                                                                                             |
| 4567                    | Gornstein B, Jacobs T, Bédard Y, Biscotti C, Ducatman B, Layfield L, McKee G, Sneige N, Wang H. Interobserver agreement of a probabilistic approach to reporting breast fine-needle aspirations on ThinPrep. <i>Diagn Cytopathol</i> . 2004 Jun;30(6):389-95.                                                              | Methodology (assessment of probabilistic approach by kappa and Spearman's rho)                                                                           |
| 4763                    | Stockbridge HL, Lewis D, Eisenberg B, Lee M, Schacher S, van Belle G, Keifer M, Brodtkin CA, Buchwald D. Brain SPECT: a controlled, blinded assessment of intra-reader and inter-reader agreement. <i>Nucl Med Commun</i> . 2002 Jun;23(6):537-44.                                                                         | Reliability (per cent kappa agreement)                                                                                                                   |
| 5050                    | Plebani M, Bernardi D, Basso D, Borghesan F, Faggian D. Measurement of specific immunoglobulin E: intermethod comparison and standardization. <i>Clin Chem</i> . 1998 Sep;44(9):1974-9.                                                                                                                                    | Methodology (comparison of the analytical and clinical performances of four second-generation techniques for allergen-specific IgE measurement in serum) |
| 5097                    | Nevill AM, Atkinson G. Assessing agreement between measurements recorded on a ratio scale in sports medicine and sports science. <i>Br J Sports Med</i> . 1997 Dec;31(4):314-8.                                                                                                                                            | Methodology (assessment of heteroscedasticity across 13 studies)                                                                                         |
| 5178                    | Carr JE, Austin J, Hatfield DB, Bailey JS. The standard deviation as an informative measure of variability in reporting interobserver agreement means. <i>J Behav Ther Exp Psychiatry</i> . 1996 Sep;27(3):263-7.                                                                                                          | Methodology (standard deviation as supplement to mean in terms of spread in the data)                                                                    |
| 5458                    | Becker MP. Using association models to analyse agreement data: two examples. <i>Stat Med</i> . 1989 Oct;8(10):1199-207.                                                                                                                                                                                                    | Methodology (alternative to BA LoA: association models)                                                                                                  |
