# Supplementary material for: Reporting Standards for a Bland–Altman Agreement Analysis: A Review of Methodological Reviews
Source: MDPI journal article supplement (doi:10.3390/diagnostics10050334), 2020-05-22
Supplement: s1 [file s1]

Supplemental Data 1: Details for search conducted with MEDLINE/PubMed

Advanced search - PubMed - N X

https://www.ncbi.nlm.nih.gov/pubmed/advanced

Søg

Mest besøgteTomTomByvej OdenseRSYD MailPubMedEnglisch ⇌ Deutsch W...Rmarkdown Introducti...RStudio CloudSample size for biolo...

PubMed HomeMore ResourcesHelp

PubMed Advanced Search Builder

YouTube Tutorial

Filters activated: Publication date from 1983/01/01 to 2020/03/03. [Clear all](#)

Use the builder below to create your search

Edit

Clear

Builder

All Fields

Show index list

ANDAll Fields

Show index list

Search or [Add to history](#)

History

[Download history](#) [Clear history](#)

| Search             | Add to builder      | Query                                                                                                                                                                          | Items found            | Time     |
|--------------------|---------------------|--------------------------------------------------------------------------------------------------------------------------------------------------------------------------------|------------------------|----------|
| <a href="#">#4</a> | <a href="#">Add</a> | Search (((reporting) OR checklist)) AND (((("method comparison") OR bland-altman) OR (bland AND altman)) OR agreement) Filters: Publication date from 1983/01/01 to 2020/03/03 | <a href="#">5551</a>   | 10:47:03 |
| <a href="#">#3</a> | <a href="#">Add</a> | Search (((reporting) OR checklist)) AND (((("method comparison") OR bland-altman) OR (bland AND altman)) OR agreement)                                                         | <a href="#">5677</a>   | 10:46:17 |
| <a href="#">#2</a> | <a href="#">Add</a> | Search (((("method comparison") OR bland-altman) OR (bland AND altman)) OR agreement                                                                                           | <a href="#">276019</a> | 10:45:09 |
| <a href="#">#1</a> | <a href="#">Add</a> | Search (reporting) OR checklist                                                                                                                                                | <a href="#">224675</a> | 10:43:32 |

You are here: NCBI > Literature > PubMed

Support Center

16:48  
28-04-2020
