# Supplementary material for: Reporting Standards for a Bland–Altman Agreement Analysis: A Review of Methodological Reviews
Source: MDPI journal article supplement (doi:10.3390/diagnostics10050334), 2020-05-22
Supplement: s1 [file s1]

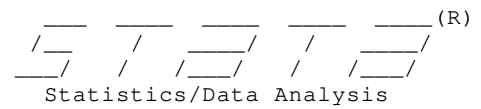

User: Supplemental Data 4

```

1 . do "C:\Users\R60\AppData\Local\Temp\STD00000000.tmp"
2 . import delimited using "Supplemental Data 2.csv", clear
   (4 vars, 420 obs)
3 . mixed value i.repeat || _all:R.patid || _all:R.rater , reml

```

Performing EM optimization:

Performing gradient-based optimization:

```

Iteration 0:   log restricted-likelihood = -931.56022
Iteration 1:   log restricted-likelihood = -931.56022

```

Computing standard errors:

```

Mixed-effects REML regression
Group variable: _all

Number of obs      =      420
Number of groups   =        1

Obs per group:
    min =      420
    avg =    420.0
    max =      420

Wald chi2(1)      =      24.32
Prob > chi2       =      0.0000

Log restricted-likelihood = -931.56022

```

| value    | Coef.            | Std. Err.       | z            | P> z         | [95% Conf. Interval] |                  |
|----------|------------------|-----------------|--------------|--------------|----------------------|------------------|
| 2.repeat | <b>-.5889469</b> | <b>.1194229</b> | <b>-4.93</b> | <b>0.000</b> | <b>-.8230115</b>     | <b>-.3548822</b> |
| _cons    | <b>24.33453</b>  | <b>.5292671</b> | <b>45.98</b> | <b>0.000</b> | <b>23.29719</b>      | <b>25.37188</b>  |

| Random-effects Parameters |               | Estimate        | Std. Err.       | [95% Conf. Interval] |                 |
|---------------------------|---------------|-----------------|-----------------|----------------------|-----------------|
| <b>_all: Identity</b>     | var(R.patid)  | <b>35.99358</b> | <b>4.360442</b> | <b>28.38613</b>      | <b>45.63981</b> |
| <b>_all: Identity</b>     | var(R.rater)  | <b>.1400625</b> | <b>.116635</b>  | <b>.0273839</b>      | <b>.7163873</b> |
|                           | var(Residual) | <b>1.019588</b> | <b>.0875645</b> | <b>.8616319</b>      | <b>1.206502</b> |

```

LR test vs. linear model: chi2(2) = 843.54          Prob > chi2 = 0.0000

```

Note: LR test is conservative and provided only for reference.

```

4 . di 2.77*sqrt(1.019588)
   2.7969978
5 . di 2.77*sqrt(1.019588 + .1400625)
   2.9829318
6 .
   end of do-file
7 .

```
