# Supplementary material for: Reporting Standards for a Bland–Altman Agreement Analysis: A Review of Methodological Reviews
Source: Diagnostics (Basel). 2020 May 22;10(5):334. doi: 10.3390/diagnostics10050334 (PMC7278016; doi:10.3390/diagnostics10050334)
Supplement: Supplementary file 1 [file diagnostics-10-00334-s001.zip]

Archive with 4 entries (4 files):
- Supplemental Data 2.csv
- Supplemental Data 4.pdf
- Supplemental Table 3.pdf
- Supplemental Data 1.pdf
