# Supplementary material for: Reporting Standards for a Bland–Altman Agreement Analysis: A Review of Methodological Reviews
Source: Diagnostics (Basel). 2020 May 22;10(5):334. doi: 10.3390/diagnostics10050334 (PMC7278016; doi:10.3390/diagnostics10050334)
Supplement: Supplementary file 1 [file diagnostics-10-00334-s001.zip › Supplemental Data 2.csv]

patid	rater	repeat	value
1	0	1	26.9
1	5	1	26.700001
1	5	2	25.9
2	0	1	14.7
2	5	1	14.8
2	5	2	16
3	0	1	22.1
3	5	1	22.1
3	5	2	22.200001
4	0	1	19.5
4	3	1	19.4
4	3	2	18.5
5	0	1	22.1
5	3	1	21
5	3	2	19
6	0	1	18.4
6	3	1	16.9
6	3	2	17.700001
7	0	1	22.6
7	3	1	23.200001
7	3	2	21.9
8	0	1	26.200001
8	1	1	26
8	1	2	27.200001
9	0	1	18.700001
9	7	1	18.200001
9	7	2	18.110001
10	0	1	28.5
10	6	1	28.6
10	6	2	28.6
11	0	1	24.799999
11	6	1	23.799999
11	6	2	22.9
12	0	1	17.200001
12	7	1	16.9
12	7	2	15.9
13	0	1	23
13	7	1	23.4
13	7	2	23.700001
14	0	1	20.6
14	1	1	19.799999
14	1	2	19.299999
15	0	1	28.799999
15	5	1	29.6
15	5	2	29.6
16	0	1	19.299999
16	5	1	20
16	5	2	20.200001
17	0	1	23.4
17	5	1	23.9
17	5	2	23.5
18	0	1	24.1
18	5	1	24.5
18	5	2	25.200001
19	0	1	17.1
19	5	1	16.799999
19	5	2	17.1
20	0	1	18.299999
20	5	1	19
20	5	2	19.200001
21	0	1	21.5
21	5	1	22.700001
21	5	2	22.5
22	0	1	29.200001
22	5	1	30.799999
22	5	2	30.5
23	0	1	24.700001
23	5	1	25.5
23	5	2	25.299999
24	0	1	21
24	5	1	21.299999
24	5	2	21.299999
25	0	1	28.799999
25	5	1	28.6
25	5	2	28.799999
26	0	1	23.5
26	5	1	23.799999
26	5	2	24.299999
27	0	1	20.299999
27	5	1	20.299999
27	5	2	21
28	0	1	28.200001
28	5	1	27.6
28	5	2	29.1
29	0	1	26.700001
29	5	1	26.200001
29	5	2	25.799999
30	0	1	26.299999
30	3	1	26.700001
30	3	2	25.5
31	0	1	37.299999
31	3	1	37.5
31	3	2	37.200001
32	0	1	23.4
32	3	1	24.700001
32	3	2	23.1
33	0	1	25.9
33	3	1	25.9
33	3	2	24.200001
34	0	1	33.900002
34	3	1	33.799999
34	3	2	34.299999
35	0	1	25
35	4	1	24.9
35	4	2	22.4
36	0	1	28.299999
36	4	1	30.200001
36	4	2	28.799999
37	0	1	18.1
37	4	1	18.799999
37	4	2	17.799999
38	0	1	38.599998
38	4	1	38.400002
38	4	2	39.700001
39	0	1	24.200001
39	4	1	25.299999
39	4	2	23.6
40	0	1	23.700001
40	4	1	24.1
40	4	2	25.299999
41	0	1	26.700001
41	4	1	24.700001
41	4	2	28.200001
42	0	1	22.6
42	4	1	22.9
42	4	2	23.9
43	0	1	17.4
43	3	1	18.200001
43	3	2	17.5
44	0	1	23.1
44	3	1	22.799999
44	3	2	22.700001
45	0	1	34.799999
45	3	1	32.700001
45	3	2	32.599998
46	0	1	37.700001
46	5	1	38.5
46	5	2	38.900002
47	0	1	26.299999
47	5	1	23.799999
47	5	2	24.200001
48	0	1	27
48	2	1	25.1
48	2	2	22
49	0	1	18.4
49	2	1	18.299999
49	2	2	15.2
50	0	1	28.4
50	2	1	29.200001
50	2	2	23.9
51	0	1	18.799999
51	2	1	19
51	2	2	16.299999
52	0	1	19.9
52	2	1	19.5
52	2	2	16.799999
53	0	1	20.5
53	2	1	19.700001
53	2	2	18.6
54	0	1	27
54	2	1	28.200001
54	2	2	22.5
55	0	1	28
55	2	1	29.200001
55	2	2	26.299999
56	0	1	40
56	2	1	43.5
56	2	2	37.599998
57	0	1	25.6
57	1	1	24.700001
57	1	2	25
58	0	1	17.200001
58	1	1	17.1
58	1	2	17.200001
59	0	1	24.5
59	1	1	23.799999
59	1	2	23.9
60	0	1	22.200001
60	4	1	21.200001
60	4	2	22.1
61	0	1	23.6
61	2	1	24.5
61	2	2	21.9
62	0	1	21.799999
62	2	1	23.1
62	2	2	19.700001
63	0	1	22.4
63	4	1	21.9
63	4	2	22.200001
64	0	1	17.799999
64	4	1	18.700001
64	4	2	18.6
65	0	1	23.1
65	2	1	17.6
65	2	2	16.9
66	0	1	22.200001
66	2	1	23.9
66	2	2	19.200001
67	0	1	23.4
67	1	1	22.299999
67	1	2	22.700001
68	0	1	31.1
68	1	1	30.1
68	1	2	29.200001
69	0	1	20.299999
69	1	1	16.700001
69	1	2	16.200001
70	0	1	32.5
70	1	1	34.299999
70	1	2	32.900002
71	0	1	26.1
71	1	1	26.700001
71	1	2	25.5
72	0	1	42
72	1	1	43.5
72	1	2	41
73	0	1	18.799999
73	7	1	19.799999
73	7	2	18.200001
74	0	1	27.5
74	7	1	28.1
74	7	2	23.4
75	0	1	37.200001
75	1	1	34.299999
75	1	2	34.599998
76	0	1	23.1
76	1	1	24.799999
76	1	2	23
77	0	1	25.799999
77	1	1	25.4
77	1	2	25
78	0	1	21.200001
78	7	1	20.4
78	7	2	19.6
79	0	1	22
79	7	1	22.5
79	7	2	20.9
80	0	1	27
80	6	1	26.700001
80	6	2	25.6
81	0	1	18.9
81	6	1	19.6
81	6	2	19.6
82	0	1	24.9
82	6	1	24.799999
82	6	2	25.299999
83	0	1	28
83	6	1	26.200001
83	6	2	28.9
84	0	1	18.9
84	3	1	18.5
84	3	2	19.799999
85	0	1	20.6
85	7	1	20.9
85	7	2	19.4
86	0	1	23
86	3	1	22.9
86	3	2	22.5
87	0	1	23.299999
87	7	1	23.1
87	7	2	22.6
88	0	1	19.1
88	7	1	19.1
88	7	2	19
89	0	1	15.3
89	7	1	15.8
89	7	2	14.8
90	0	1	18.799999
90	7	1	19.200001
90	7	2	19.700001
91	0	1	28.4
91	7	1	28.4
91	7	2	25.5
92	0	1	13.4
92	4	1	12.9
92	4	2	13.1
93	0	1	29.200001
93	4	1	28.6
93	4	2	32.299999
94	0	1	16.6
94	4	1	16.700001
94	4	2	15.4
95	0	1	35
95	4	1	34.400002
95	4	2	35.799999
96	0	1	16.700001
96	7	1	17
96	7	2	16.5
97	0	1	22.799999
97	6	1	22.4
97	6	2	22.799999
98	0	1	37.299999
98	6	1	34.299999
98	6	2	36.700001
99	0	1	27.6
99	3	1	26.700001
99	3	2	26.6
100	0	1	15.1
100	3	1	16.1
100	3	2	14.3
101	0	1	14.8
101	6	1	14.1
101	6	2	14.7
102	0	1	30
102	6	1	29.299999
102	6	2	29.299999
103	0	1	22.9
103	6	1	22.6
103	6	2	22.4
104	0	1	25
104	6	1	24.700001
104	6	2	24.200001
105	0	1	24.9
105	6	1	25.5
105	6	2	24.700001
106	0	1	23.6
106	7	1	22.5
106	7	2	23.299999
107	0	1	31.299999
107	7	1	31.299999
107	7	2	31
108	0	1	22.700001
108	4	1	22.799999
108	4	2	22.799999
109	0	1	27.1
109	4	1	29.700001
109	4	2	28.5
110	0	1	27.200001
110	4	1	28.200001
110	4	2	29.200001
111	0	1	35.099998
111	4	1	37
111	4	2	35.700001
112	0	1	15.4
112	4	1	16.200001
112	4	2	15.7
113	0	1	26.299999
113	2	1	27.6
113	2	2	23.799999
114	0	1	25.1
114	2	1	25.4
114	2	2	22.1
115	0	1	16.9
115	2	1	18.5
115	2	2	16.799999
116	0	1	25
116	2	1	27.700001
116	2	2	24.799999
117	0	1	18.4
117	2	1	18.9
117	2	2	18.200001
118	0	1	22.6
118	2	1	21.6
118	2	2	20.4
119	0	1	20.299999
119	1	1	19.200001
119	1	2	19.700001
120	0	1	19.9
120	1	1	19.1
120	1	2	17.299999
121	0	1	25.700001
121	3	1	25.5
121	3	2	23.6
122	0	1	30.6
122	3	1	30.200001
122	3	2	30.200001
123	0	1	25.200001
123	1	1	25.700001
123	1	2	25.9
124	0	1	25.1
124	3	1	24.9
124	3	2	24.700001
125	0	1	21
125	1	1	20.299999
125	1	2	20.5
126	0	1	18.9
126	1	1	19.1
126	1	2	19.6
127	0	1	24.6
127	1	1	25.700001
127	1	2	25.1
128	0	1	24.200001
128	7	1	23.4
128	7	2	24.9
129	0	1	17.9
129	7	1	20.200001
129	7	2	17.799999
130	0	1	31.799999
130	7	1	31.4
130	7	2	31.1
131	0	1	23.5
131	6	1	22.9
131	6	2	21.9
132	0	1	17.799999
132	7	1	17.799999
132	7	2	19.200001
133	0	1	22.6
133	6	1	22.200001
133	6	2	22.4
134	0	1	16.200001
134	6	1	15.8
134	6	2	17.299999
135	0	1	39.5
135	6	1	41
135	6	2	41.200001
136	0	1	44.299999
136	3	1	43
136	3	2	43.200001
137	0	1	27.200001
137	6	1	25.6
137	6	2	26.5
138	0	1	16.299999
138	6	1	15.5
138	6	2	15.4
139	0	1	27.6
139	6	1	25
139	6	2	26.9
140	0	1	20.799999
140	2	1	22.799999
140	2	2	17.700001
